# Supplementary material
Source: Springer Nature journal article supplement (https://www.springermedizin.de/resource/supplementary/12957_2011_936_MOESM2_ESM.pdf/9565814)

### Comparison of PCIs between Surgeon and Radiologist 1

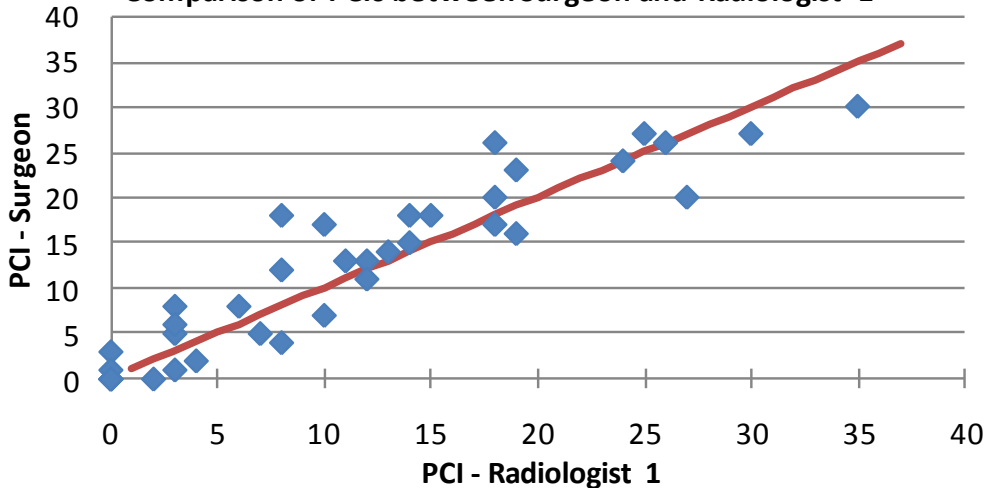

Supplement: MOESM2 [file 9565814]
